# Supplementary material for: CONSORT: Sam68 Is Directly Regulated by MiR-204 and Promotes the Self-Renewal Potential of Breast Cancer Cells by Activating the Wnt/Beta-Catenin Signaling Pathway
Source: PubMed Central journal article supplement (PMC5008509; doi:10.1097/md.0000000000002228), 2015-12-11
Supplement: medi-94-e2228-s001.pdf [file medi-94-e2228-s001.pdf]

**Sam68 is directly regulated by miR-204 and promotes the self-renewal potential of breast cancer cells by activating the Wnt/beta-catenin signaling pathway**

Lan Wang,MD<sup>1†</sup>, Han Tian,MD<sup>2,3†</sup>, Jie Yuan,MD<sup>3</sup>, Hongmei Wu,MD<sup>1</sup>, Jueheng Wu,MD<sup>3</sup>, Xun Zhu,MD<sup>2,3\*</sup>

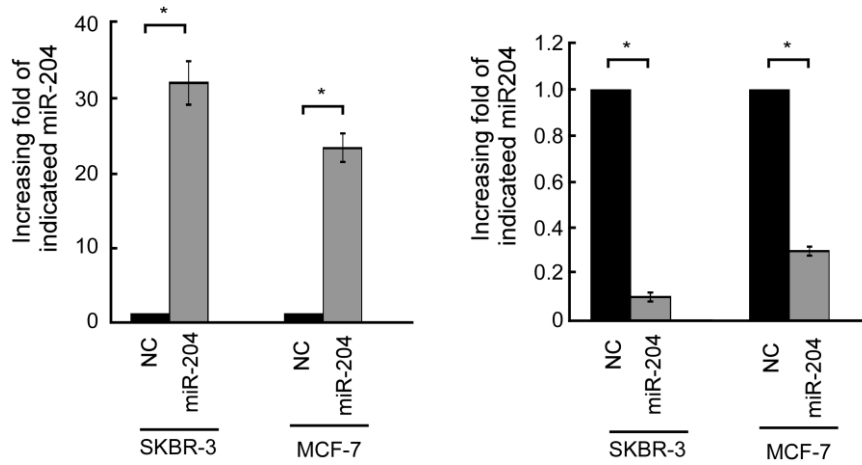

Supplemental Digital Content.

1, Supplemental figure 1. Real-time PCR analysis of miR-204 expression in breast cancer cell line with or without miR-204 transfections.
